# Supplementary material
Source: publisher figshare collection journal article supplement (https://gsajournals.figshare.com/ndownloader/files/24620867)
Supplement: Supplementary file 1 [file 24620867]

## Sheet: single colonies
Table S4: List of HGT fragments and mutations detected in single colonies
	colony 2	colony 3	colony 5	colony 6	colony 7	colony 8	colony 9	colony 4	colony 10	colony 12	colony 1	colony 11
HGT 1	1	1	1	1	1	1	0	0	0	0	0	0
HGT 2	1	1	1	1	1	1	0	0	0	0	0	0
HGT 3	1	1	1	1	1	1	0	0	0	0	0	0
HGT 4	1	1	1	1	1	1	0	0	0	0	0	0
HGT 5	1	1	1	1	1	1	0	0	0	0	0	0
HGT 6	1	1	1	1	1	1	0	0	0	0	0	0
HGT 7	1	1	1	1	1	1	0	0	0	0	0	0
HGT 8	1	1	1	1	1	1	0	0	0	0	0	0
HGT 9	1	1	1	1	1	1	0	0	0	0	0	0
HGT 10	1	1	1	1	1	1	0	0	0	0	0	0
HGT 11	1	1	1	1	1	1	0	0	0	0	0	0
HGT 12	1	1	1	1	1	1	0	0	0	0	0	0
HGT 13	1	1	1	1	1	1	0	0	0	0	1	1
HGT 14	1	1	1	1	1	1	0	0	0	0	0	0
HGT 15	1	1	1	1	1	1	0	0	0	0	0	0
HGT 16	1	1	1	1	1	1	0	0	0	0	0	0
HGT 17	1	1	1	1	1	1	0	0	0	0	0	0
HGT 18	0	0	0	0	0	0	1	0	0	0	0	0
HGT 19	0	0	0	0	0	0	0	0	0	0	1	1
HGT 20	0	0	0	0	0	0	0	1	1	1	0	0
HGT 21	0	0	0	0	0	0	0	1	1	1	0	0
HGT 22	0	0	0	0	0	0	0	1	1	1	0	0
HGT 23	0	0	0	0	0	0	0	0	0	0	1	1
HGT 24	0	0	0	0	0	0	0	0	0	0	1	1
HGT 25	0	0	0	0	0	0	0	0	0	0	1	1
mut1	0	0	0	0	0	0	0	0	0	0	0	0
mut2	0	0	0	0	0	0	0	0	0	0	0	0
mut3	0	0	0	0	0	0	0	0	0	0	0	0
mut4	0	0	0	0	0	0	1	1	1	1	0	0
mut5	1	1	1	1	1	1	0	0	0	0	0	0
mut6	1	1	1	1	1	1	0	0	0	0	0	0
mut7	1	1	1	1	1	1	0	0	0	0	0	0
mut8	0	0	0	0	0	0	0	1	1	1	0	0
mut9	0	0	0	0	0	0	0	1	1	1	0	0
mut10	0	0	0	0	0	0	0	1	1	1	0	0
mut11	0	0	0	0	0	0	0	1	1	1	0	0
mut12	0	0	0	0	0	0	0	1	1	1	0	0
mut13	0	1	0	1	0	1	0	0	0	0	0	0
mut14	0	0	0	0	0	0	0	0	0	0	1	1
mut15	0	0	0	0	0	0	0	0	0	0	1	1
mut16	0	0	0	0	0	0	0	0	0	0	1	1
mut17	0	0	0	0	0	0	0	0	0	0	1	1
mut18	0	0	0	0	0	0	0	0	0	0	1	1
mut19	0	0	0	0	0	0	0	0	0	0	1	1
mut20	0	0	0	0	0	0	0	0	0	0	1	1
mut21	0	0	0	0	0	0	0	0	0	0	1	1
mut22	0	0	0	0	0	0	0	0	0	0	1	1
mut23	0	0	0	0	0	0	0	0	0	0	1	1
Presented are 12 single colonies randomly picked form other-Bacillus population 3 at generation 504 (columns). The presence of each HGT fragment and each mutation (identified in other-Bacillus population 3) in each of the colonies is marked (“1” present, “0” absent). Colonies are colored and ordered based on clone identity.
